# Supplementary material for: COVID-19 vaccine hesitancy: A Systematic review of cognitive determinants
Source: PubMed Central journal article supplement (PMC10257562; doi:10.34172/hpp.2023.03), 2023-04-30
Supplement: hpp-13-21-s001.pdf [file hpp-13-21-s001.pdf]

### **Supplementary File 1.** Search Strategy for the PubMed Database

("COVID-19 Vaccines"[Mesh]) OR (COVID 19 vaccine\*[Title/Abstract]) AND (percept\*[Title/Abstract] OR cognitive [Title/Abstract] OR psychological[Title/Abstract] OR conceptual[Title/Abstract]) AND (determinant\*[Title/Abstract] OR factor\*[Title/Abstract]) AND (acceptance[Title/Abstract] OR hesitancy[Title/Abstract] OR Uncertainty[Title/Abstract] OR confidence[Title/Abstract] OR engagement[Title/Abstract] OR barrier[Title/Abstract] OR rejection[Title/Abstract] OR fear[Title/Abstract] OR doubt[Title/Abstract] OR distrust[Title/Abstract] OR dropout[Title/Abstract] OR exemption[Title/Abstract] OR trust[Title/Abstract] OR mistrust[Title/Abstract] OR refusal[Title/Abstract] OR rejection[Title/Abstract] OR controvers\*[Title/Abstract] OR opposition[Title/Abstract] OR delay[Title/Abstract] OR dilemma\*[Title/Abstract] OR uptake\*[Title/Abstract] OR concern\*[Title/Abstract] OR perception[Title/Abstract]),,("COVID-19 Vaccines"[MeSH Terms] OR "COVID 19 vaccine\*" [Title/Abstract]) AND ("percept\*" [Title/Abstract] OR "cognitive"[Title/Abstract] OR "psychological"[Title/Abstract] OR "conceptual"[Title/Abstract]) AND ("determinant\*" [Title/Abstract] OR ""factor\*" [Title/Abstract]) AND ("acceptance"[Title/Abstract] OR "hesitancy"[Title/Abstract] OR "Uncertainty"[Title/Abstract] OR "confidence"[Title/Abstract] OR "engagement"[Title/Abstract] OR "barrier"[Title/Abstract] OR "rejection"[Title/Abstract] OR "fear"[Title/Abstract] OR "doubt"[Title/Abstract] OR "distrust"[Title/Abstract] OR "dropout"[Title/Abstract] OR "exemption"[Title/Abstract] OR "trust"[Title/Abstract] OR "mistrust"[Title/Abstract] OR ""refusal"" [Title/Abstract] OR "rejection"[Title/Abstract] OR ""controvers\*" [Title/Abstract] OR ""opposition"[Title/Abstract])

OR "delay"[Title/Abstract] OR "dilemma\*"[Title/Abstract] OR "uptake\*"[Title/Abstract] OR  
"concern\*"[Title/Abstract] OR "perception"[Title/Abstract]).
